# Supplementary material for: Efficacy and Safety of Magnesium-Based Bioresorbable Scaffolds in All Coronary Artery Diseases: A Systematic Review and Proportional Meta-Analysis
Source: Research Square preprint supplement (doi:10.21203/rs.3.rs-6767226/v1), 2025-06-25
Supplement: Supplementary file 1 [file e6f6ee5e5388384286feddac.docx]

| **Study ID** |  | **Population type** | **Acute coronary syndrome type** | **Total Number of Lesions** | **Location of lesion/ Target Vessel RCA/LAD/LCx** | **Type of Lesion Grade and classification (number of lesions)** |  | | **Intervention** | | | | **Diabetes %** | **Hypertension %** | **Smoking status %** | **Prior MI %** | **TIMI thrombus** |  |  | **Any Prior Percutaneous Coronary Intervention (%)** |
| --- | --- | --- | --- | --- | --- | --- | --- | --- | --- | --- | --- | --- | --- | --- | --- | --- | --- | --- | --- | --- |
|  | **Lesion length** | | **Follow up duration** | **DAPT Used** |
|  |  |  | **%** |  |  |  | **Mean (mm)** | **SD (mm)** | **Name of Intervention** | **Model/ Type** | **Scaffold Dimensions (mm)** | **Total number of Scaffolds used (n)** |  |  |  |  | **Grade (%)** | **Months (n)** | **Name + number of patients** |  |
| Gutiérrez-Barrios, 2021 |  | Patients with Acute Coronary Syndrome (ACS) | STEMI: 45.6% NSTEMI: 40.0% Unstable Angina: 14.4% | 90 | LAD: 41.6% RCA: 40.0% Circumflex Artery: 14.4% | NR | 2127 | ±7.70 | MgBRS, Magmaris | Magmaris® (Biotronik) | Diameter: 3.31 ± 0.24  Length: 21.27 ± 7.70 | 90 | 22.20% | 41.90% | 64.40% | 4.40% | Grade 0: 45.6% Grade 1: 37.8% Grade 2: 6.7% Grade 3: 10.0% Grades 4-5: 0% | 24 | Aspirin: 100% of patients  Clopidogrel: 25.6% of patients  Prasugrel: 6.7% of patients  Ticagrelor: 67.8% of patients | 8.90% |
| Hemptinne, 2018 |  | Patients with (STEMI) | STEMI: 100% | 18 | NR | NR | 12.7 | 0 | Magmaris | Magmaris® (Biotronik) | Diameter: 3.5 (max) Length: 25 (max) | 21 | 28% | 17% | 72% | 0% | NR | 5 | Aspirin: 100% of patients  Ticagrelor: 100% of patients | 0% |
| Włodarczak, 2023(a) |  | Diabetic and non-diabetic patients with NSTE-ACS | NSTEMI: 163  Unstable Angina: 30 | 193 | Diabetic: LAD 43%,  LCx 25%  RCA 30.6% Non-diabetic: LAD 40.5%  LCx 25.6%, RCA 32.2% | Type A/B1: 56 lesions (77.8%)  Type B2/C: 16 lesions (22.2%) | 1600 | 0 | Magmaris | Magmaris® (Biotronik) | Diameter: 3.0-3.5  Length: 15-25 | 204 | 37.3%. | 88.60% | NR | NR | NR | 24 | Aspirin: 100% of patients  Clopidogrel: 36.1% of diabetic patients, 41.3% of non-diabetic patients  Ticagrelor: 63.9% of diabetic patients, 58.7% of non-diabetic patients | 40.40% |
| Abellas-Sequeiros,2020 |  | Patients undergoing PCI | NSTEMI: 52.4%  Effort angina: 45.2% STEMI: 2.4% | 42 | ADA: 50% Circumflex Artery: 38.1% RCA: 11.9% | Type A/B1: 56 lesions (77.8%)  Type B2/C: 16 lesions (22.2%)​ | 1936 | ±3.55 | Magmaris | Magmaris® (Biotronik) | Diameter: 3.30±0.25  Length: 19.36±3.55 | 42 | 28.60% | 50% | 71.50% | NR | Grade 0: No thrombus (45.6%)  Grade 1: Possible thrombus (37.8%)  Grade 2: Definite thrombus, ≤1/2 vessel diameter (6.7%)  Grade 3: Definite thrombus, >1/2 but <2 vessel diameters (10.0%) | 12 | Aspirin: 100% of patients  Clopidogrel: 36.1% of patients  Ticagrelor: 63.9% of patients​ | NR |
| Gomez-Lara 2020 |  | STEMI patients undergoing primary PCI | STEMI: 100% | 95 | LAD 50%,  RCA 30.9%, Circumflex 19.6% | NR | 2070 | ±3.8 | MgBRS, Magmaris | Magmaris® (Biotronik) | Diameter: 3.0–3.5  Length: 15–25 | 150 | 14.0% 25.5% | 48.0% 40.4% | 54.00% | 10.00% | Pre-PCI TIMI Thrombus Grade:  Grade 0: 10.4%  Grade 1: 6.3%  Grade 2: 18.8%  Grade 3: 25.0%  Grade 4: 20.8%  Grade 5: 18.8% | 12 | Aspirin: 100% of patients  Clopidogrel: 16% of patients  Ticagrelor: 50% of patients | 6.00% |
| Al Nooryani 2022 |  | Patients treated with Magmaris Bioresorbable Metallic Scaffold | Unstable angina: 24  NSTEMI: 19 STEMI: 7 | 54 | LAD: 44% LCx: 17% RCA: 37% | NR | 21.4 | ±3.7 | Magmaris | Magmaris® (Biotronik) | Diameter: 3.30 ± 0.25  Length: 21.4 ± 3.7 | 64 | 61% | 52% | 54% | 22% | NR | 47 | Aspirin: 100% of patients  Clopidogrel: 59% of patients  Ticagrelor: 41% of patients | 15% |
|  |  |  |  |  |  |  |  |  |  |  |  |  |  |  |  |  |  |  |  |  |
| Hemptinne 2022 |  | STEMI patients undergoing primary PCI | STEMI: 100% | 30 | LAD: 60.0% RCA: 36.7% LCx: 3.3% | NR | 19.31 | ± 7.37 | Magmaris | Magmaris® (Biotronik) | Diameter: 3.20 ± 0.25  Length: 22.0 ± 3.4 | 30 | 16.70% | 53.30% | 76.70% | 0% | Pre-PCI: 66.7% TIMI 0 3.3% TIMI 1 20.0% TIMI 2 10.0% TIMI 3 Post-PCI: 96.7% TIMI 3 (full perfusion) | 12 | Aspirin: 100% of patients  Clopidogrel: 59% of patients  Ticagrelor: 41% of patients | 0% |
| Wlodarczak, 2023 |  | ACS patients  (NSTEMI and unstable angina) | Unstable angina: 52% NSTEMI: 48% | 51 | RCA:n= 25 LAD: n=19 LCx: n=7 | A: 5(9.8%), B1 : 35(68.6%) B2: 11(21.6%) | NR | NR | Magmaris | Magmaris Biotronik | Diameter: 3.26 ± 0.25 Length: 21.41 ± 3.00 | 53 | 40% | 90% | 38% | 30% | Grade 0-2: 20% of patients | 1 , 6 | ASA+ Ticagrelor: 30 (60%) ASA+ Clopidogrel: 20(40%) | NR |
| Galli, 2023 |  | ACS and SCAD patients | ACS (NSTEMI, STEMI, Unstable Angina): n=62 SCAD: n=145 | NR | RCA: 29% LAD: 44% LCx: 22% | A/B1: 111 (53%) B2/C: 96 (46%) | 16.5 | ± 5.7 | Magmaris | Magmaris Biotronik | Diameter: 3.3± 0.2 Length: 20.7 ± 4.0 | NR | 20% | 66% | NR | 25% | Grade 3: 88% | 12 , 24 | Aspirin+plavix: 145 (70%) Aspirin+Ticagrelor: 39 (19%) Aspirin+prasugrel: 23 (11%) | 34% |
| Wlodarczak, 2023 |  | ACS and SCAD patients | NSTEMI:18.5% Stable Angina: 48.3% Unstable Angina: 17.3% Silent Ischemia: 15.4% | 2,154 | RCA:n= 620 LAD: n=1,067 LCx: n=442 Ramus intermedius: n=25 | Type A: 813 (37.7%)  Type B1: 1,012 (47.0%)  Type B2: 255 (11.8%)  Type C :74 (3.4%) | 14.8 | ± 4.0 | Magmaris | Magmaris Biotronik | Diameter: 3.3±0.3  Length:19.5±3.9 | 2207 | 21.60% | 66.30% | 59.20% | 21.70% | NR | 24 | 12month: 72.7% pt 24 month: 21.3% (names not mentioned) | 28.80% |
| Hideo-Kajita, 2019 |  | CAD patients (MI, Stable angina, unstable angina) | Unstable Angina: 12.5%  Stable Angina: Majority of patients | 521 | LAD: 41.3%  LCx: 24.9% RCA: 33.9% | Type A : 79 (41.8%) Type B1: 74(39.2%)  Type B2: 28 (14.8%)  Type C: 8 (4.2%) | 12.4 | ± 5.0  ± 6.7 | Magmaris | Magmaris Biotronik | NR | NR | 22.80% | 79.40% | Current smokers: 39.1%  Former smokers: 16.3% | 22.80% | NR | 12 | Given to all patients | 41.30% |
| Cerrato, 2020 |  | - | STEMI: 15.9% NSTEMI: 31.8% Unstable Angina: 4.5% Stable Angina or Silent Ischemia: 47.3% | 49 | LAD: n=28 LCx: n=8  RCA: n=13 | Type B2/C 47 (96%) | 32.2 | ± 17.2 | Magmaris | Magmaris Biotronik | Diameter: 3.2 ± 0.2 Length: 34.9 ± 17.8 | 75 | 22.70% | 59.10% | Current smokers: 50%  Former smokers: 18.2% | 38.6% (17 patients) | NR | 12 | ASA and P2Y21 inhibitors | 38.60% |
| Tousek, 2021 |  | ACS Patients | STEMI: 72% NSTEMI: 24%  Unstable Angina: 4% | NR | LAD: 44%  RCA: 36% LCx: 20% | NR | 24.6 | ± 10.7  ± 11.1 | Magmaris | Magmaris Biotronik | NR | NR | 12% | 77% | 72% | 22% | NR | 12 | NR | NR |
| Włodarczak, 2024 |  | ACS patients | NSTEMI: 84.5%  Unstable Angina: 15.5% | NR | LAD: n=80 RCA: n=61 LCx: n=49 | NR | 20.8 | :± 3.3 | Magmaris | Magmaris Biotronik | Diameter: 3.0,3.5  Length: 15, 20,25 | NR | 37.30% | 88.60% | Current smokers 29.5% Former smokers 40.4% | 30.5% (59 patients) | NR | 24 | ASA 193(100%), Clopidogrel 76 (39.4%) Ticagrelor 117 (60.6%) Prasugrel 0 (0%) | 40.40% |
| Hansen, 2025 |  | Stable angina patients | Stable angina: 100% | NR | LAD: n=47 LCx: n=11 RCA: n=17 | NR | 20 | NR | Magmaris | Magmaris Biotronik | Diameter: 3.5 Length: 20.0 | NR | Scoring Balloon: 9.8% (4 patients) Standard Balloon: 19.5% (8 patients) | Scoring Balloon: 41.5% (17 patients) Standard Balloon: 61.0% (25 patients) | Current smokers: 14.6% (scoring balloon),  14.6% (standard balloon) Previous smokers: 51.2% (scoring balloon),  26.8% (standard balloon) | Scoring Balloon: 22.0% (9 patients) Standard Balloon: 9.8% (4 patients) | NR | 6 | NR | 41.40% |
| Wlodarczack, 2021 |  | ACS Patients | Unstable Angina: 32% NSTEMI: 65% STEMI: 2% | 194 | RCA: n=62 LAD: n=80 LCA: n=52 | A+B1 lesions: 74 AHA/ACC Classification | NR | NR | Magmaris | Magmaris Biotronik | Scaffold diameters: 3.0, 3.5  Scaffold lengths: 15, 20, 25 | 204 | 36.3 | 89.1 | 22.8 | 31.1 | Grade 2 or 3: 100% | 24 | Aspirin+Ticagrelor: 117 Aspirin+Clopidogrel: 74 | 42% |
