# Supplementary material for: Efficacy and Safety of Magnesium-Based Bioresorbable Scaffolds in All Coronary Artery Diseases: A Systematic Review and Proportional Meta-Analysis
Source: Research Square preprint supplement (doi:10.21203/rs.3.rs-6767226/v1), 2025-06-25
Supplement: Supplementary file 2 [file f9e1e1ff22601b185688c1bd.docx]

***HIGHLIGHTS***

- This is the most comprehensive meta-analysis on Mg-based bioresorbable scaffolds to date.
- Mg-BRS showed acceptable safety with low rates of scaffold thrombosis and other cardiac/noncardiac outcomes.
- Clinical outcomes were consistent across various coronary artery disease subtypes.
- Results support the potential of Mg-BRS as a viable alternative to permanent stents.
- Findings provide evidence to guide future scaffold design and clinical adoption.
